# Supplementary material
Source: bioRxiv or medRxiv preprint supplement (https://medrxiv.org/highwire/filestream/82881/field_highwire_adjunct_files/0/2020.05.19.20107094-1.pdf)
Supplement: Supplementary file [file 2020.05.19.20107094-1.pdf]

# Supplementary materials

## Ethnicity is the second most important COVID-19 risk factor in Brazil

Pedro Baqui,<sup>1,\*</sup> Ioana Bica,<sup>2,3,\*</sup> Valerio Marra,<sup>1,4,†</sup> Ari Ercole,<sup>5</sup> and Mihaela van der Schaar<sup>3,6,7</sup>

<sup>1</sup>*Núcleo de Astrofísica e Cosmologia (Cosmo-ufes),*

*Universidade Federal do Espírito Santo, 29075-910, Vitória, ES, Brazil*

<sup>2</sup>*Department of Engineering Science, University of Oxford, Parks Road, Oxford OX1 3PJ, UK*

<sup>3</sup>*The Alan Turing Institute, 96 Euston Rd, London NW1 2DB, UK*

<sup>4</sup>*PPGCosmo & Departamento de Física, Universidade Federal do Espírito Santo, 29075-910, Vitória, ES, Brazil*

<sup>5</sup>*University of Cambridge Department of Medicine,*

*Addenbrooke's Hospital, Hills Road, Cambridge CB2 0QQ, UK*

<sup>6</sup>*Centre for Mathematical Sciences, University of Cambridge, Wilberforce Rd, Cambridge CB3 0WA, UK*

<sup>7</sup>*Department of Electrical Engineering, University of California, Los Angeles, Los Angeles, CA 90095 USA*

### I. HANDLING OF MISSING VALUES

We report in Table I and Table II the number of patients (and their percentage) with missing values for the symptoms and comorbidities respectively. In our analysis, we consider that the symptom/comorbidity is not present if its value is missing from the data. We believe that in the hospitalization chart there is bias towards recording the present symptoms and comorbidities. This was indicated by the fact that some patients had recorded ‘Yes’ for a few comorbidities (the present one) and missing values for the rest, while some other patients had recorded ‘Yes’ for a few comorbidities and ‘No’ for the others. A similar pattern was also observed for the symptoms, although the percentage of patients having missing symptoms is much smaller. We have included for reference the hospitalization chart.

Table I: Percentages of patients with missing values for symptoms.

| Symptom                | No. (%) of patients with missing values<br>(out of 11321 hospitalized patients) | No. (%) of patients with missing values<br>(out of 6883 patients with known outcomes) |
|------------------------|---------------------------------------------------------------------------------|---------------------------------------------------------------------------------------|
| Fever                  | 527 (4.65%)                                                                     | 324 (4.45%)                                                                           |
| Cough                  | 472 (4.16%)                                                                     | 320 (4.39%)                                                                           |
| Sore throat            | 1949 (17.2%)                                                                    | 1197 (16.5%)                                                                          |
| Shortness of breath    | 715 (6.32%)                                                                     | 421 (5.78%)                                                                           |
| Respiratory discomfort | 1119 (9.88%)                                                                    | 666 (9.15%)                                                                           |
| SpO2 < 95%             | 1212 (10.7%)                                                                    | 746 (10.3%)                                                                           |
| Diarrhea               | 2146 (18.9%)                                                                    | 1351 (18.6%)                                                                          |
| Vomiting               | 2330 (20.5%)                                                                    | 1457 (20.0%)                                                                          |

Table II: Percentages of patients with missing values for comorbidities.

| Comorbidity            | No. (%) of patients with missing values<br>(out of 11321 hospitalized patients) | No. (%) of patients with missing values<br>(out of 6883 patients with known outcomes) |
|------------------------|---------------------------------------------------------------------------------|---------------------------------------------------------------------------------------|
| Cardiovascular disease | 5326 (47.0%)                                                                    | 3302 (45.3%)                                                                          |
| Asthma                 | 6570 (58.0%)                                                                    | 4088 (56.2%)                                                                          |
| Diabetes               | 5681 (50.2%)                                                                    | 3508 (48.2%)                                                                          |
| Pulmonary disease      | 6529 (57.6%)                                                                    | 4052 (55.7%)                                                                          |
| Obesity                | 6685 (59.0%)                                                                    | 4184 (57.5%)                                                                          |
| Immunosuppression      | 6560 (58.0%)                                                                    | 4090 (56.2%)                                                                          |
| Renal disease          | 6549 (57.8%)                                                                    | 4068 (55.9%)                                                                          |
| Liver disease          | 6671 (58.9%)                                                                    | 4150 (57.0%)                                                                          |
| Neurological disease   | 6550 (57.9%)                                                                    | 4083 (56.1%)                                                                          |

\* These authors contributed equally to this work.

† Corresponding author: [marra@cosmo-ufes.org](mailto:marra@cosmo-ufes.org)

## II. ADDITIONAL RESULTS FROM COX ANALYSIS

### A. Adding region characteristics as fixed effects

To assess the robustness of our results, we have also added as fixed effects the number of ICU beds, ventilators and nurses per 100 million inhabitant in each patient's state. See Fig. 1.

### B. Splitting patients by different regions

To further assess the robustness of our results, we have also performed the Cox regression separately on the patients in the North and South regions (see Figs. 2 and 3), on patients in São Paulo (see Fig. 4) and on the patients outside of São Paulo and Amazonas (the ones with the highest number of cases per capita, see Fig. 5)

## III. EDUCATION, INCOME AND HEALTH INDEXES

Table III: Education, income and health indexes used to separate Brazil in the North and Central-South regions. Percentages except where otherwise stated.

| State               | Acron. | Literacy <sup>1</sup> | food security <sup>2</sup> | higher education <sup>3</sup> | life [yr] expectancy <sup>4</sup> | school drop out <sup>5</sup> | per capita <sup>6</sup> GDP [R\$] | poverty <sup>7</sup> level | salary <sup>8</sup> [R\$] | child mortality <sup>9</sup> |
|---------------------|--------|-----------------------|----------------------------|-------------------------------|-----------------------------------|------------------------------|-----------------------------------|----------------------------|---------------------------|------------------------------|
| Acre                | AC     | 86.9                  | 68.8                       | 5.83                          | 74.2                              | 7.5                          | 17202.                            | 18.9                       | 889                       | 16.3                         |
| Alagoas             | AL     | 80.6                  | 65.4                       | 4.66                          | 72.                               | 4.1                          | 15653.5                           | 20.5                       | 730                       | 18.3                         |
| Amapá               | AP     | 95                    | 72.1                       | 6.98                          | 74.2                              | 4.                           | 19405.1                           | 12.8                       | 879                       | 23.                          |
| Amazonas            | AM     | 93.1                  | 57.1                       | 5.32                          | 72.1                              | 8.5                          | 22936.3                           | 19.3                       | 842                       | 17.7                         |
| Bahia               | BA     | 87                    | 62.2                       | 4.51                          | 73.7                              | 3.                           | 17508.7                           | 17.7                       | 912                       | 16.6                         |
| Ceará               | CE     | 84.8                  | 64.5                       | 4.96                          | 74.1                              | 3.2                          | 16395.                            | 18.4                       | 942                       | 13.8                         |
| Distrito Federal    | DF     | 97.4                  | 86.7                       | 17.49                         | 78.4                              | 2.4                          | 80502.5                           | 1.9                        | 2685                      | 10.3                         |
| Espírito Santo      | ES     | 93.8                  | 89.6                       | 8.34                          | 78.5                              | 2.8                          | 28222.6                           | 4.3                        | 1476                      | 8.4                          |
| Goiás               | GO     | 93.5                  | 80.4                       | 7.75                          | 74.3                              | 2.7                          | 28308.8                           | 3.7                        | 1306                      | 14.5                         |
| Maranhão            | MA     | 83.3                  | 39.1                       | 3.56                          | 70.9                              | 3.7                          | 12788.8                           | 26.3                       | 635                       | 20.3                         |
| Mato Grosso         | MT     | 93.5                  | 80.6                       | 7.65                          | 74.5                              | 3.3                          | 37914.                            | 5.9                        | 1402                      | 16.5                         |
| Mato Grosso do Sul  | MS     | 93.7                  | 81.8                       | 8.86                          | 75.8                              | 2.8                          | 35520.5                           | 5.                         | 1514                      | 13.6                         |
| Minas Gerais        | MG     | 93.8                  | 81.6                       | 7.95                          | 77.5                              | 2.4                          | 27282.8                           | 4.7                        | 1357                      | 10.4                         |
| Pará                | PA     | 90.7                  | 62.2                       | 4.06                          | 72.3                              | 5.9                          | 18549.3                           | 19.2                       | 806                       | 16.1                         |
| Paraíba             | PB     | 83.7                  | 63.5                       | 5.71                          | 73.5                              | 2.8                          | 15497.7                           | 16.3                       | 928                       | 15.4                         |
| Paraná              | PR     | 95.5                  | 83.9                       | 9.71                          | 77.4                              | 2.4                          | 37221.                            | 3.                         | 1.62                      | 8.9                          |
| Pernambuco          | PE     | 87.2                  | 74.1                       | 5.67                          | 74.3                              | 3.5                          | 19164.5                           | 16.1                       | 970                       | 12.1                         |
| Piauí               | PI     | 82.8                  | 44.4                       | 5.1                           | 71.2                              | 2.3                          | 14089.8                           | 21.6                       | 826                       | 18.5                         |
| Rio de Janeiro      | RJ     | 97.3                  | 82.2                       | 10.91                         | 76.5                              | 3.                           | 40155.8                           | 3.9                        | 1881                      | 11.1                         |
| Rio Grande do Norte | RN     | 85.3                  | 67.5                       | 5.89                          | 76.                               | 2.7                          | 18333.2                           | 13.                        | 1056                      | 14.                          |
| Rio Grande do Sul   | RS     | 96.8                  | 84.1                       | 8.67                          | 78.                               | 2.1                          | 37371.3                           | 2.9                        | 1842                      | 9.3                          |
| Rondônia            | RO     | 93.3                  | 78.4                       | 5.66                          | 71.5                              | 3.2                          | 24092.8                           | 7.9                        | 1136                      | 19.6                         |
| Roraima             | RR     | 93.4                  | 67.3                       | 6.72                          | 71.8                              | 7.7                          | 23158.1                           | 17.9                       | 1043                      | 17.                          |
| Santa Catarina      | SC     | 97.2                  | 88.9                       | 9.69                          | 79.4                              | 1.9                          | 39592.3                           | 1.7                        | 1769                      | 8.9                          |
| São Paulo           | SP     | 97.2                  | 88.4                       | 11.67                         | 78.4                              | 2.9                          | 47008.8                           | 2.7                        | 1945                      | 9.6                          |
| Sergipe             | SE     | 85.3                  | 67.3                       | 6.                            | 72.9                              | 2.7                          | 17789.2                           | 15.3                       | 979                       | 15.4                         |
| Tocantins           | TO     | 89.6                  | 62.4                       | 7.05                          | 73.7                              | 2.5                          | 21998.3                           | 11.9                       | 1055                      | 15.3                         |

We split the data into two contrasting regions to present our descriptives. To make this division we consider several factors such as education (literacy, higher education and school drop-out rates), income (per-capita gross domestic product, salary and poverty level) and health (life expectancy, child mortality and food security), see Tab. III. Note that ethnicity is not used as a criterion. In order to combine the indexes of Tab. III into a single development index we normalized their values between 0 and 1 and summed them. All terms are considered positive except school drop out, poverty level and child mortality that are considered negative. The result is given in Fig. 6. We used the gap at the development index of about 2 in order to split Brazil in the North (North and Northeast macroregions) and Central-South (Central-West, Southeast and South) regions. It is interesting to note that this division is the

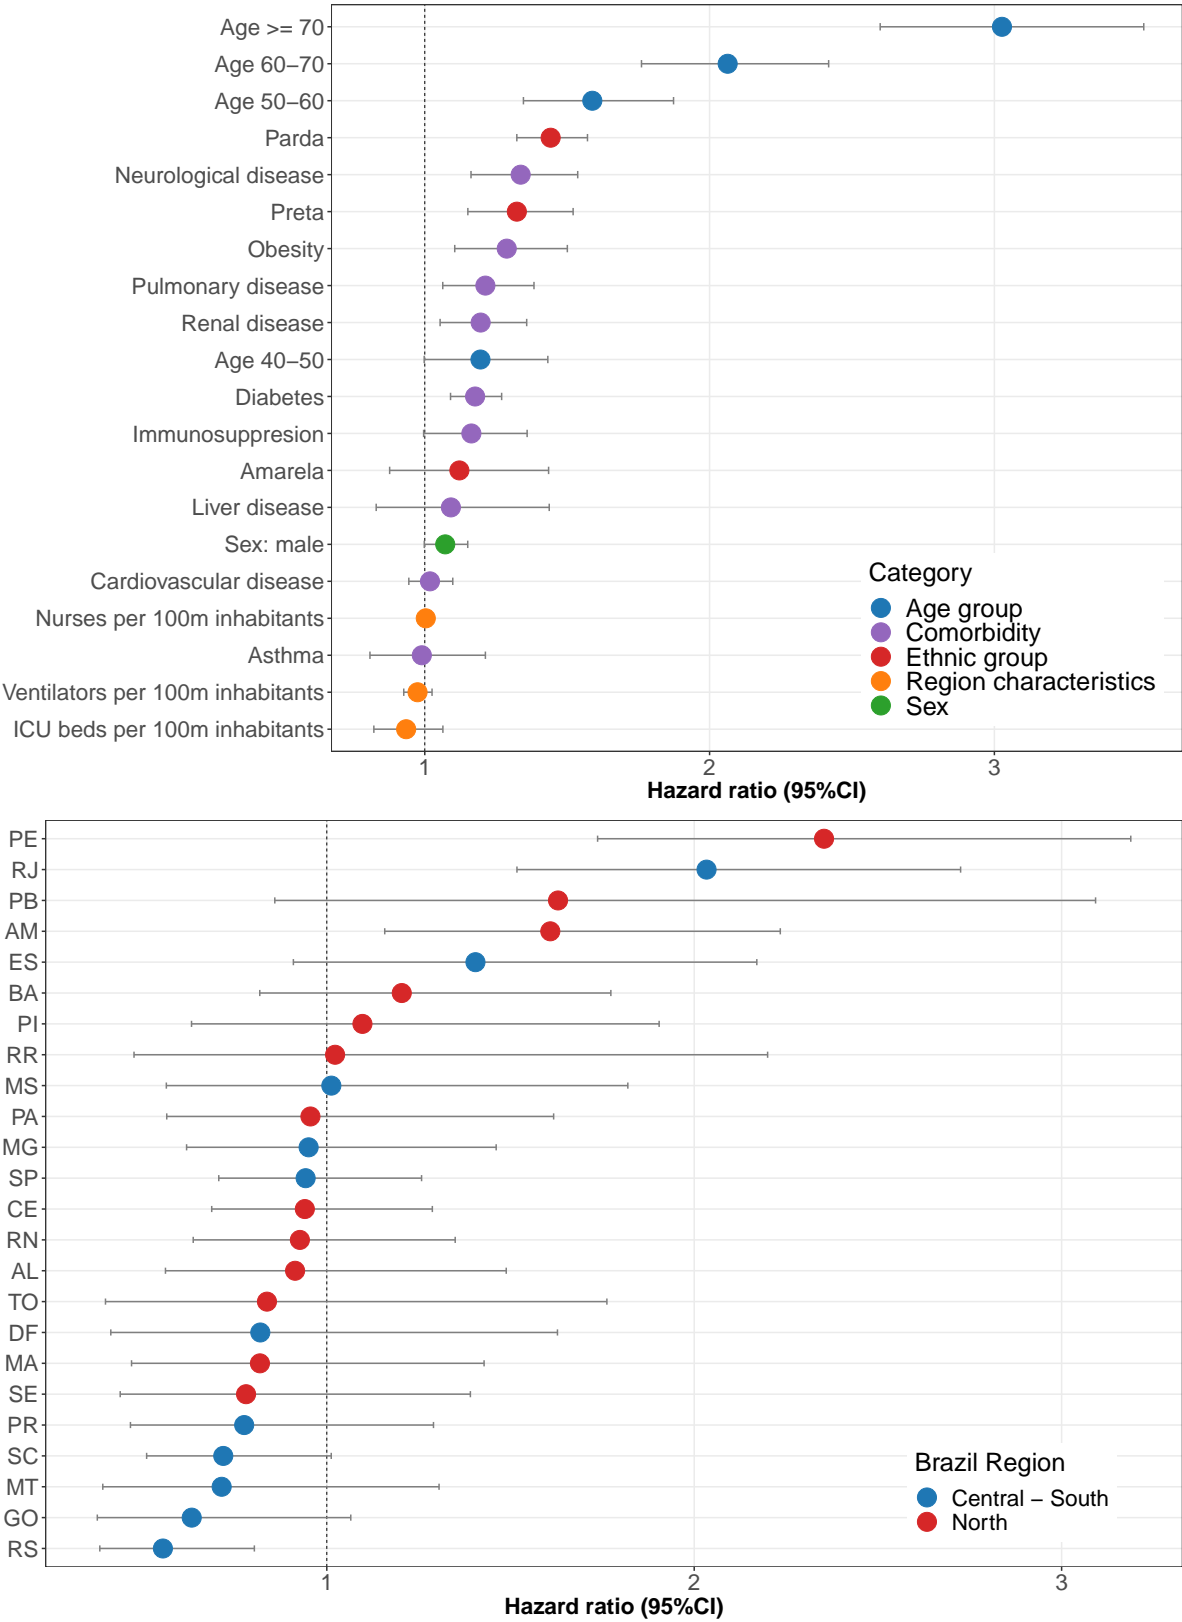

Figure 1: Fixed effects (top) and random effects (bottom) (hazard ratio) estimates with their 95% confidence intervals for in-hospital mortality with added region characteristics.

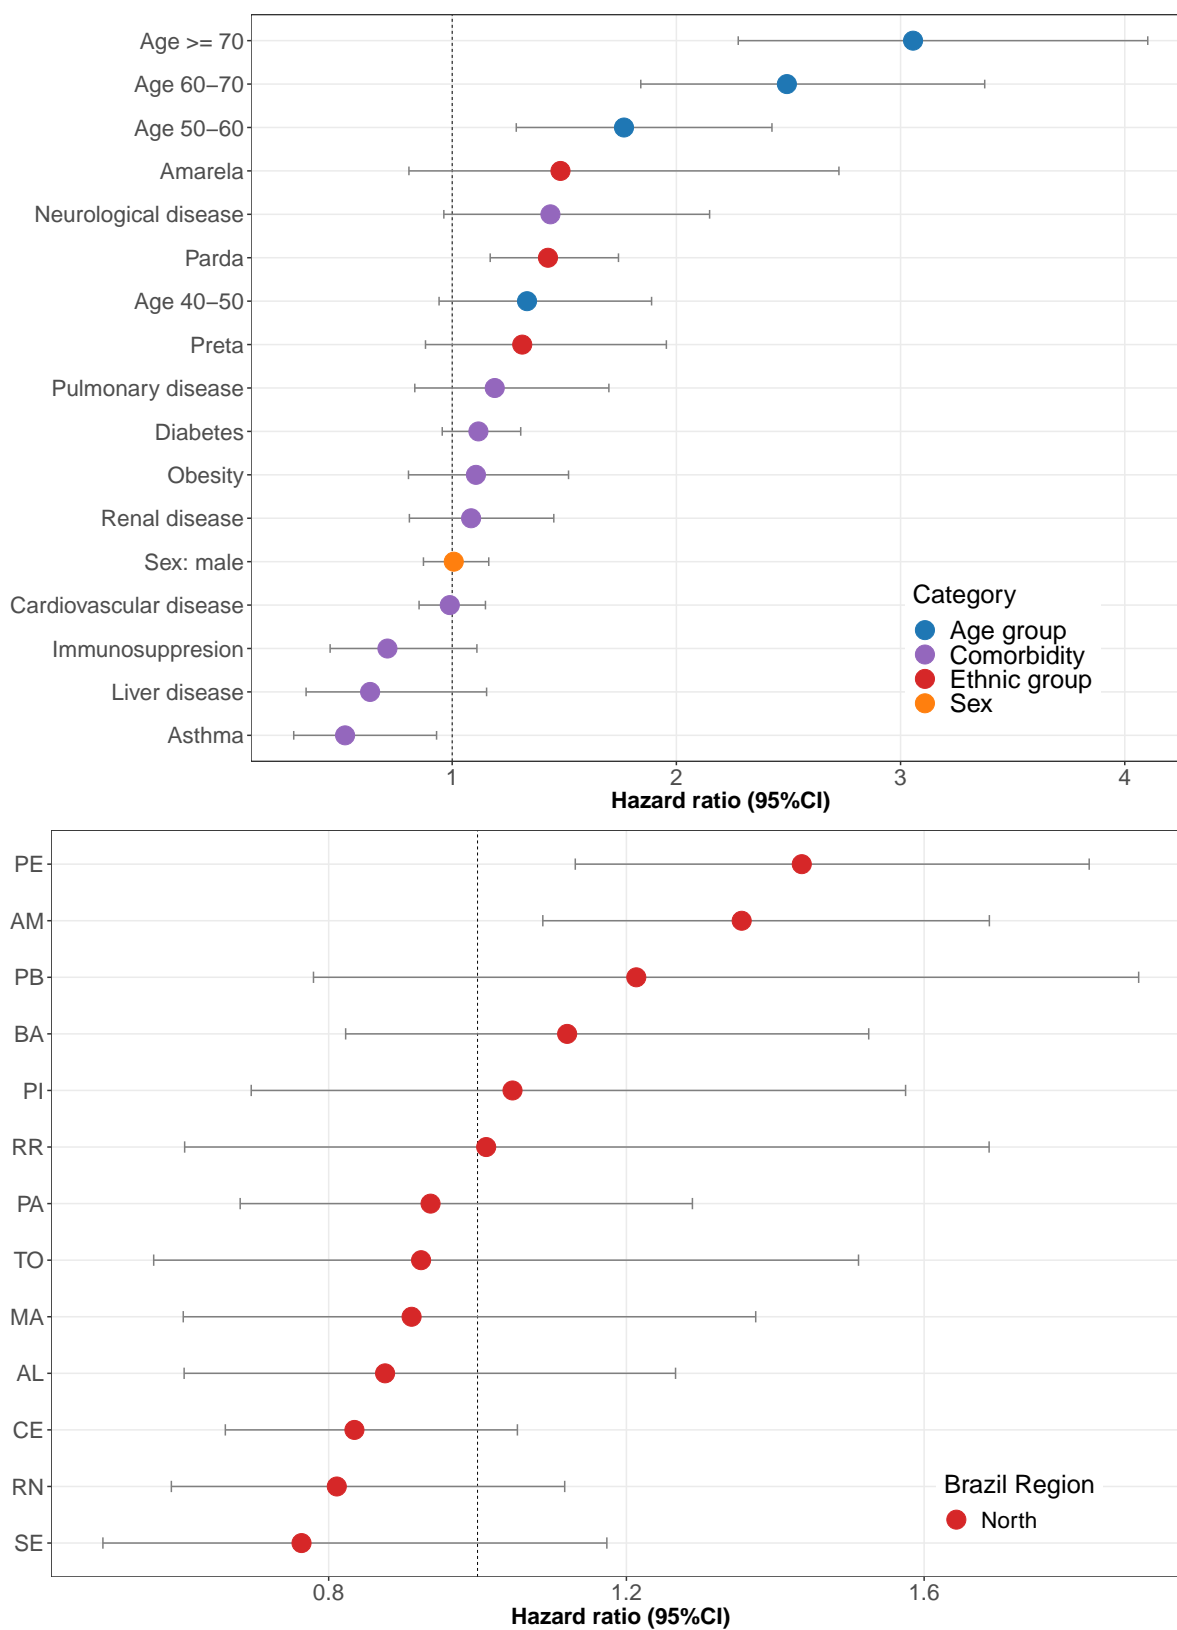

Figure 2: Fixed effects (top) and random effects (bottom) (hazard ratio) estimates with their 95% confidence intervals for in-hospital mortality. North region only.

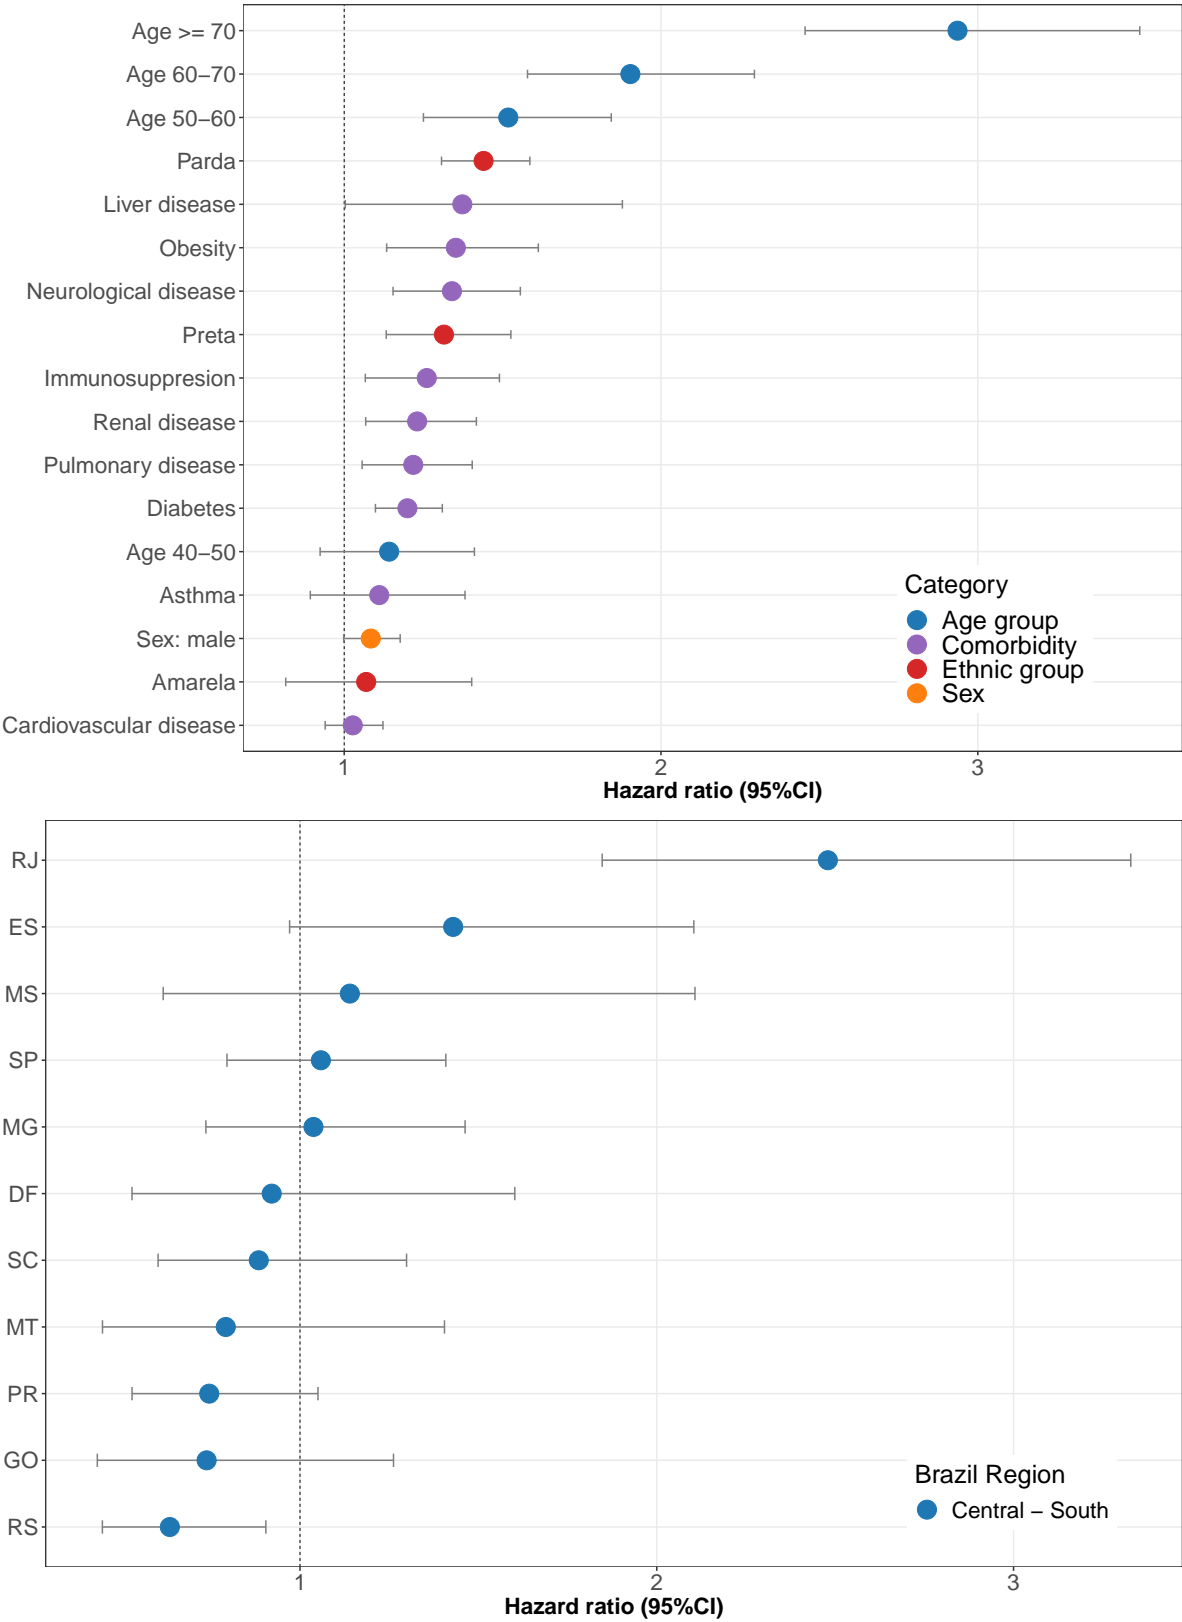

Figure 3: Fixed effects (top) and random effects (bottom) (hazard ratio) estimates with their 95% confidence intervals for in-hospital mortality. Central-South region only.

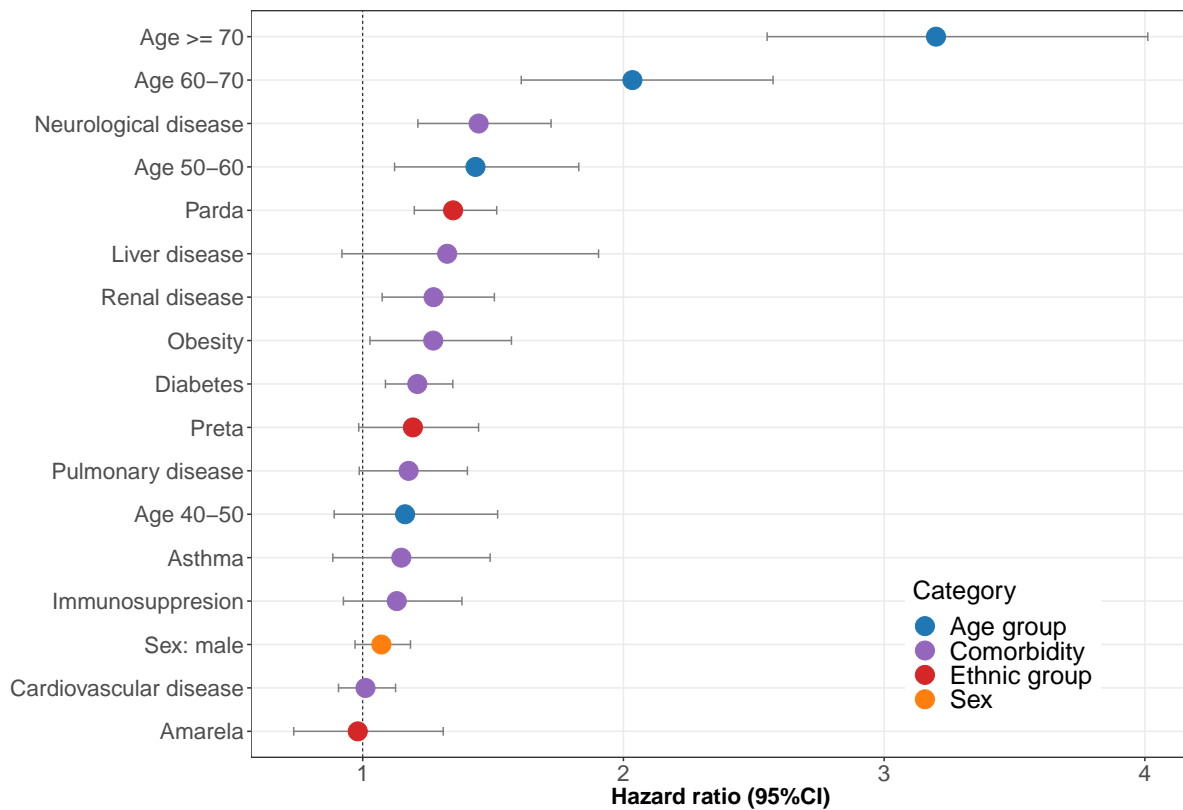

Figure 4: Hazard ratio and for in-hospital mortality for SP only.

customary one between North and South. The tables relative to number of ICU beds, ventilators, doctors and nurses in the public and private health care system are publicly available.<sup>10</sup>

#### IV. INTERNATIONAL PASSENGERS LANDING IN BRAZIL

Fig. 7 shows the number of passengers arriving in Brazil from abroad in 2019 for the various Brazilian states. Data from ANAC (Agência Nacional de Aviação Civil).<sup>11</sup> SP is the most international state followed by RJ.

- 
- [1] Wikipedia. Lista de unidades federativas do Brasil por alfabetização, 2016. URL [https://pt.wikipedia.org/wiki/Lista\\_de\\_unidades\\_federativas\\_do\\_Brasil\\_por\\_alfabetizaç~ao](https://pt.wikipedia.org/wiki/Lista_de_unidades_federativas_do_Brasil_por_alfabetizaç~ao). (accessed May 10, 2020).
  - [2] Wikipedia. Lista de unidades federativas do Brasil por segurança alimentar, 2013. URL [https://pt.wikipedia.org/wiki/Lista\\_de\\_unidades\\_federativas\\_do\\_Brasil\\_por\\_segurança\\_alimentar](https://pt.wikipedia.org/wiki/Lista_de_unidades_federativas_do_Brasil_por_segurança_alimentar). (accessed May 10, 2020).
  - [3] Wikipedia. Lista de unidades federativas do Brasil por porcentagem de pessoas com nível superior completo, 2010. URL [https://pt.wikipedia.org/wiki/Lista\\_de\\_unidades\\_federativas\\_do\\_Brasil\\_por\\_porcentagem\\_de\\_pessoas\\_com\\_n%C3%ADvel\\_superior\\_completo](https://pt.wikipedia.org/wiki/Lista_de_unidades_federativas_do_Brasil_por_porcentagem_de_pessoas_com_n%C3%ADvel_superior_completo). (accessed May 10, 2020).
  - [4] Wikipedia. Lista de unidades federativas do Brasil por expectativa de vida, 2017. URL [https://pt.wikipedia.org/wiki/Lista\\_de\\_unidades\\_federativas\\_do\\_Brasil\\_por\\_expectativa\\_de\\_vida](https://pt.wikipedia.org/wiki/Lista_de_unidades_federativas_do_Brasil_por_expectativa_de_vida). (accessed May 10, 2020).
  - [5] Wikipedia. Lista de unidades federativas do Brasil por porcentagem de crianças e adolescentes fora da escola, 2010. URL [https://pt.wikipedia.org/wiki/Lista\\_de\\_unidades\\_federativas\\_do\\_Brasil\\_por\\_porcentagem\\_de\\_crianças\\_e\\_adolescentes\\_fora\\_da\\_escola](https://pt.wikipedia.org/wiki/Lista_de_unidades_federativas_do_Brasil_por_porcentagem_de_crianças_e_adolescentes_fora_da_escola). (accessed May 10, 2020).
  - [6] Wikipedia. Lista de unidades federativas do Brasil por PIB per capita, 2017. URL [https://pt.wikipedia.org/wiki/Lista\\_de\\_unidades\\_federativas\\_do\\_Brasil\\_por\\_PIB\\_per\\_capita](https://pt.wikipedia.org/wiki/Lista_de_unidades_federativas_do_Brasil_por_PIB_per_capita). (accessed May 10, 2020).
  - [7] Wikipedia. Lista de unidades federativas do Brasil por incidência da pobreza, 2010. URL [https://pt.wikipedia.org/wiki/Lista\\_de\\_unidades\\_federativas\\_do\\_Brasil\\_por incidência\\_da\\_pobreza](https://pt.wikipedia.org/wiki/Lista_de_unidades_federativas_do_Brasil_por incidência_da_pobreza). (accessed May 10, 2020).

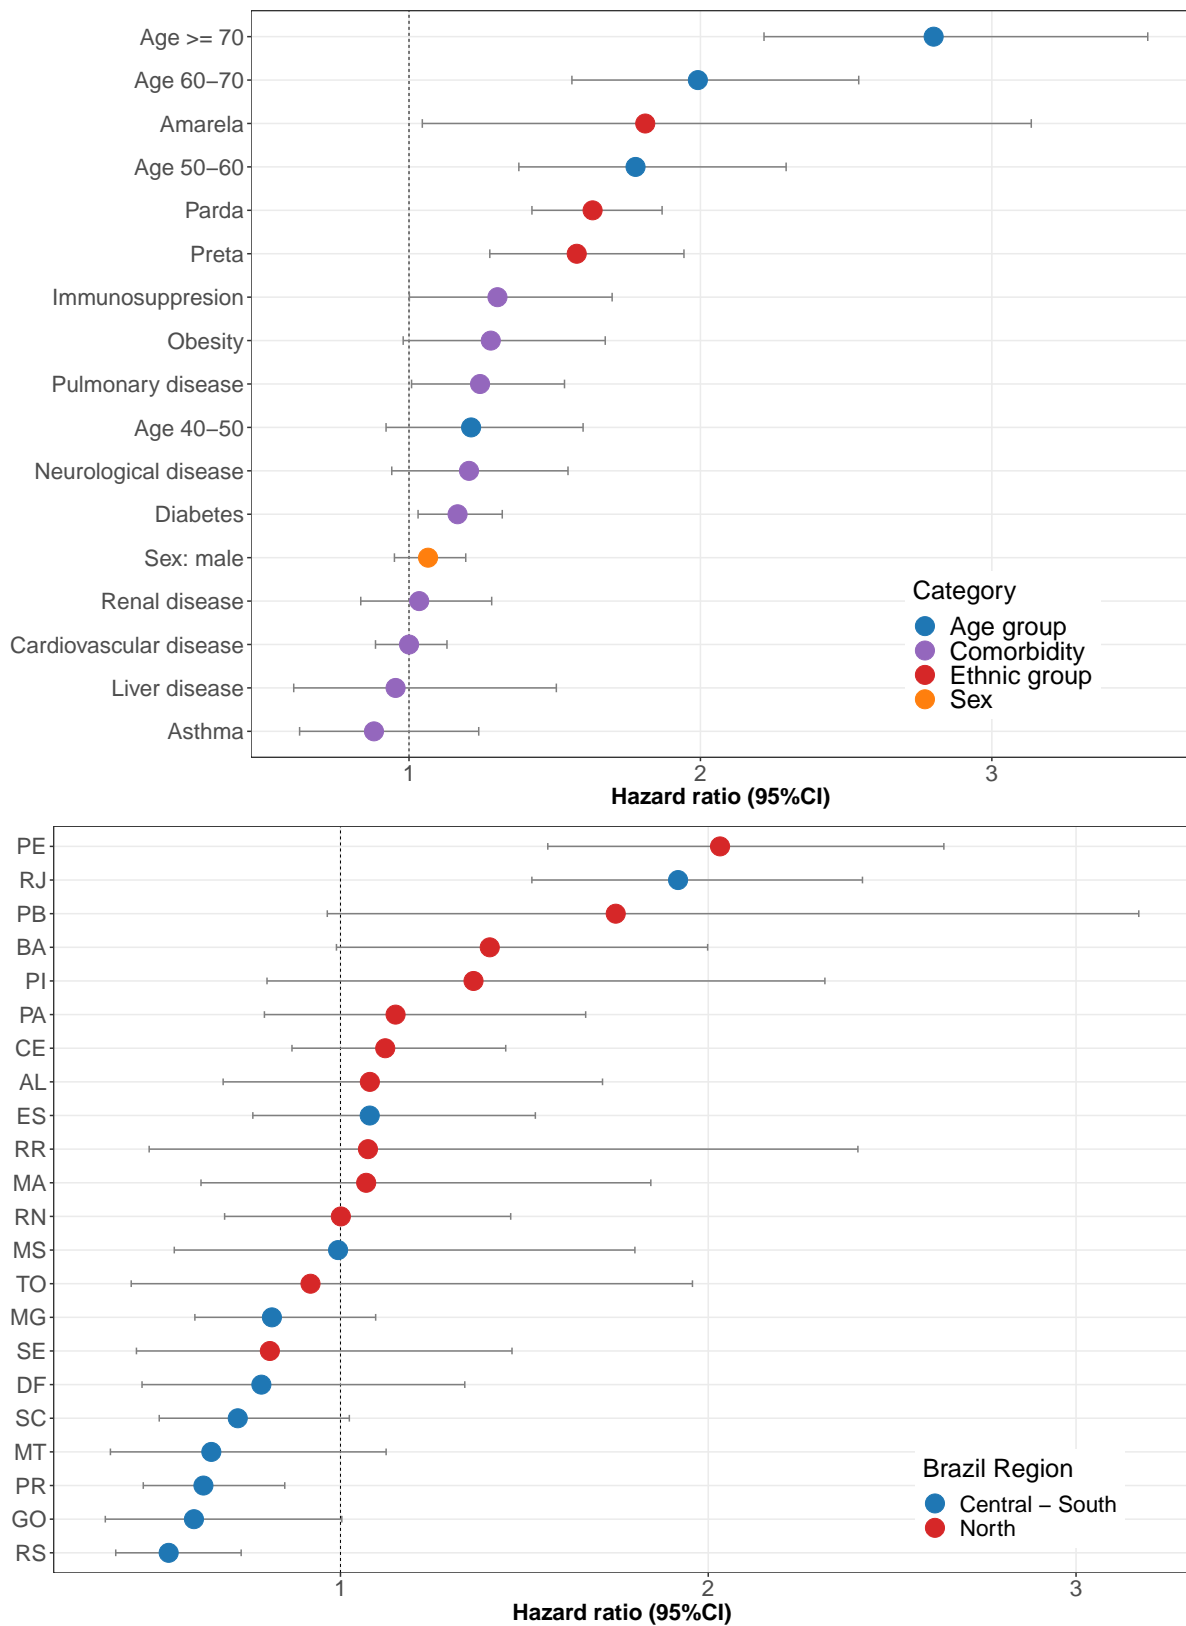

Figure 5: Fixed effects (top) and random effects (bottom) (hazard ratio) estimates with their 95% confidence intervals for in-hospital mortality. All Brazil except SP & AM.

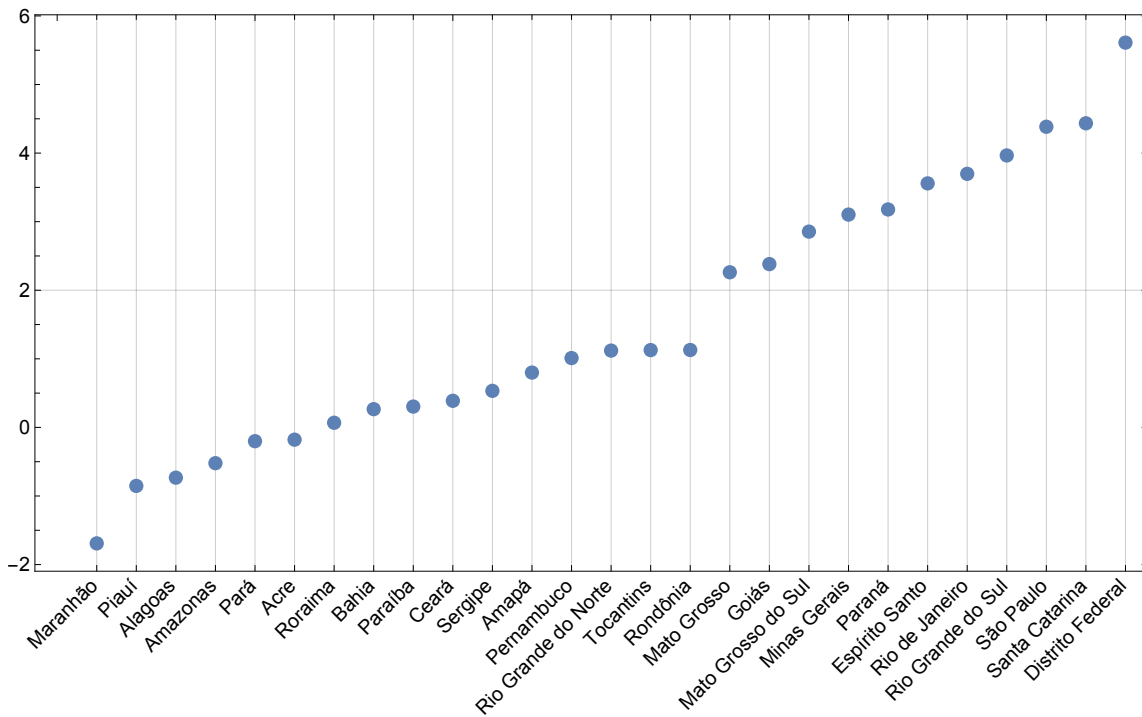

Figure 6: Development index for the Brazilian states.

- [8] Wikipedia. Lista de unidades federativas do Brasil por renda per capita, 2019. URL [https://pt.wikipedia.org/wiki/Lista\\_de\\_unidades\\_federativas\\_do\\_Brasil\\_por\\_renda\\_per\\_capita](https://pt.wikipedia.org/wiki/Lista_de_unidades_federativas_do_Brasil_por_renda_per_capita). (accessed May 10, 2020).
- [9] Wikipedia. Lista de unidades federativas do Brasil por mortalidade infantil, 2017. URL [https://pt.wikipedia.org/wiki/Lista\\_de\\_unidades\\_federativas\\_do\\_Brasil\\_por\\_mortalidade\\_infantil](https://pt.wikipedia.org/wiki/Lista_de_unidades_federativas_do_Brasil_por_mortalidade_infantil). (accessed May 10, 2020).
- [10] Brazilian Institute of Geography and Statistics. Informações de Saúde, 2020. URL <https://mapasinterativos.ibge.gov.br/covid/saude/>. (accessed May 10, 2020).
- [11] Agência Nacional de Aviação Civil. Dados Estatísticos, 2020. URL <https://www.anac.gov.br/assuntos/dados-e-estatisticas/dados-estatisticos/dados-estatisticos>. (accessed May 10, 2020).



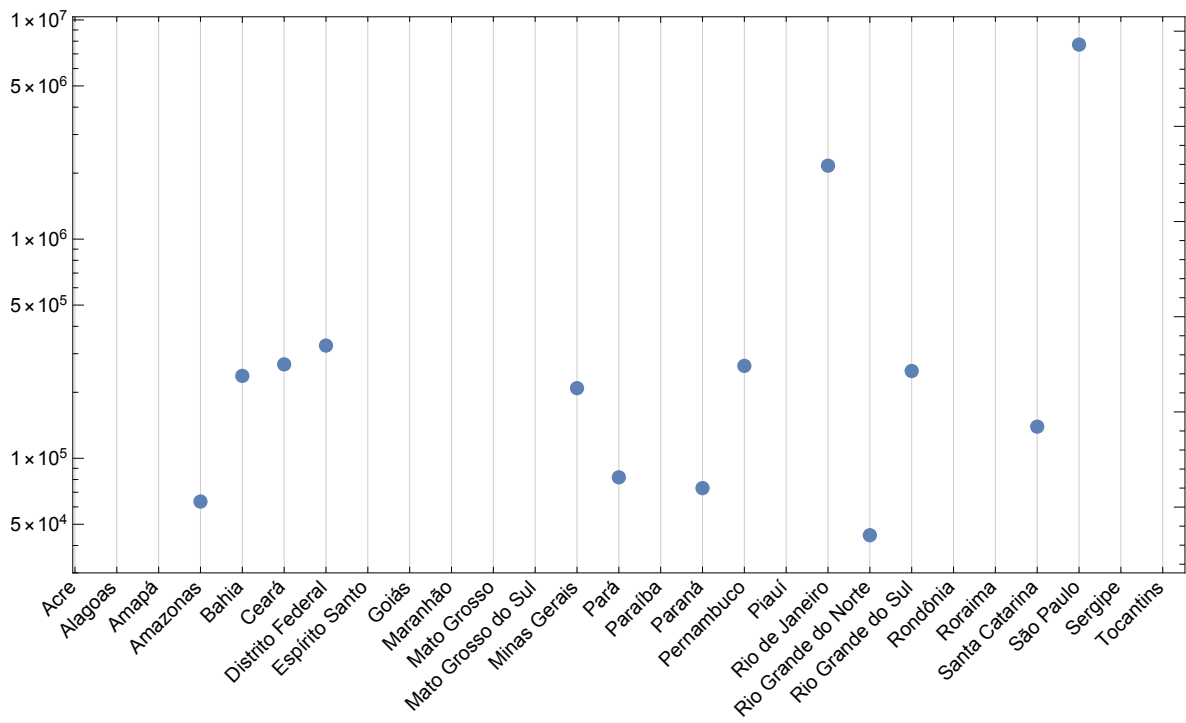

Figure 7: International passengers landing on the Brazilian states.
